# Supplementary material for: Robust, highly active, and stable supported Co(ii) nanoparticles on magnetic cellulose nanofiber-functionalized for the multi-component reactions of piperidines and alcohol oxidation
Source: PubMed Central journal article supplement — RSC Adv. 2021 Jul 1;11(38):23192–206. doi: 10.1039/d1ra00208b (PMC9036309; doi:10.1039/d1ra00208b), 2021-07-01
Supplement: RA-011-D1RA00208B-s001.pdf [file RA-011-D1RA00208B-s001.pdf]

## Survey cobalt (II) supported on cellulose functionalized Fe<sub>3</sub>O<sub>4</sub> nanoparticles as a novelty catalyst for the synthesis of piperidines

Pouya Ghamari kargar <sup>a</sup>, Ghodsieh Bagherzade \* <sup>a</sup>

### Selected spectral data

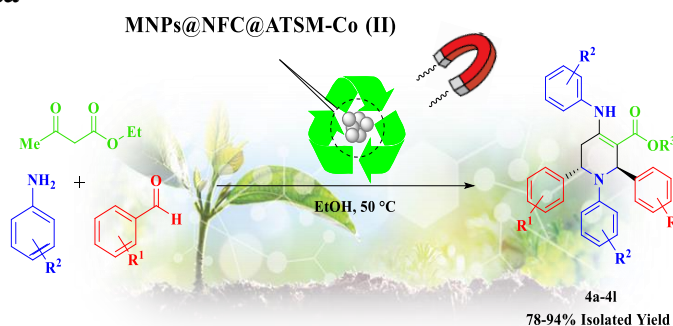

#### Ethyl 1,2,6-triphenyl-4-(phenylamino)-1,2,5,6-tetrahydropyridine-3-carboxylate (4a)

White solid; m.p. (°C): = 174–175 °C.

<sup>1</sup>H NMR (300 MHz, CDCl<sub>3</sub>): δ = 1.36 (3H, t, CH<sub>3</sub>), 2.64–2.81 (2H, dd-dd, CH<sub>2</sub>), 4.16–4.40 (2H, m), 5.04–5.05 (1H, d), 6.15–6.18 (2H, t), 6.34 (1H, s), 6.40 (2H, d), 6.47 (1H, t), 6.91–7.02 (5H, m), 7.04–7.29 (10H, m), 10.17 (1H, NH).

<sup>13</sup>CNMR (DMSO, 75 MHz): δ = 14.59, 35.69, 47.86, 60.62, 61.47, 101.37, 114.30, 121.04, 122.07, 127.06, 127.32, 128.36, 129.50, 134.60, 138.89, 141.40, 149.72, 167.92 ppm.

Anal. Calcd. For C<sub>32</sub>H<sub>30</sub>N<sub>2</sub>O<sub>2</sub>: C, 80.98; H, 6.37; N, 5.90; O, 6.74 Found: C, 80.89; H, 6.39; N, 5.87; O, 6.85.

#### Methyl 1,2,6-triphenyl-4-(phenylamino)-1,2,5,6-tetrahydro pyridine-3-carboxylate (4b)

White solid; m.p. = 169–170 °C.

<sup>1</sup>H NMR (300 MHz, CDCl<sub>3</sub>): δ = 3.86 (3H, s), 5.06–5.07 (1H, d), 6.18–6.20 (2H, dd), 6.38 (1H, s), 6.43–6.46 (2H, d), 6.50–6.55 (1H, t), 6.96–7.26 (17H, m), 10.18 (1H, NH) ppm.

<sup>13</sup>CNMR (DMSO, 75 MHz): δ = 14.59, 35.69, 47.86, 50.60, 61.46, 101.32, 114.30, 121.04, 122.03, 127.10, 127.30, 128.37, 129.49, 134.61, 138.88, 141.48, 149.60, 167.97 ppm.

Anal. Calcd. For C<sub>32</sub>H<sub>30</sub>N<sub>2</sub>O<sub>2</sub>: C, 80.84; H, 6.13; N, 6.08; O, 6.95 Found: C, 80.83; H, 6.15; N, 6.05; O, 6.97.

#### 1-(2,6-bis(4-bromophenyl)-1-(4-chlorophenyl)-4-((4-chlorophenyl) amino)-1,2,5,6-tetra hydro pyridin-3-yl) propan-1-one (4f)

White solid; m.p. = 155–157 °C.

<sup>1</sup>H MNR (300 MHz, CDCl<sub>3</sub>): δ = 2.58–2.78 (2H, dd-dd, CH<sub>2</sub>), 3.87 (3H, s), 4.99–5.00 (1H, d), 6.19–6.22 (2H, d), 6.28–6.31 (2H, d), 6.90–7.20 (12H, m), 10.12 (1H, NH) ppm.

<sup>a</sup>Department of Chemistry, Faculty of Sciences, University of Birjand, Birjand, 97175-615, Iran. P.Ghamari71@gmail.com.

Corresponding author: E-mail: gbagherzade@gmail.com, bagherzade@birjand.ac.ir; Fax: +98 56 32345192; Tel: +98 56 32345192 Address here.

<sup>13</sup>CNMR (DMSO, 75 MHz): δ= 10.91, 31.39, 35.88, 47.84, 59.88, 101.65, 116.77, 121.74, 125.64, 127.02, 127.67, 128.71, 129.50, 131.23, 132.24, 137.55, 140.85, 147.59, 199.96 ppm.

Anal. Calcd. For C<sub>32</sub>H<sub>26</sub>Br<sub>2</sub>Cl<sub>2</sub>N<sub>2</sub>O: C, 56.09; H, 3.82; N, 4.09; O, 2.33 Found: C, 56.02; H, 3.90; N, 4.06; O, 2.35.

**Methyl 2,6-bis(4-chlorophenyl)-1-phenyl-4-(phenylamino)-1,2,5,6-tetrahydropyridine-3-carboxylate (4k)**

White solid; m.p. = 183–187 °C.

<sup>1</sup>H NMR (300 MHz, CDCl<sub>3</sub>): δ= 2.63-2.78 (2H, dd-dd, CH<sub>2</sub>), 3.84 (3H, s), 5.01-5.02 (1H, d), 6.28 (1H, s), 6.31-6.34 (2H, dd), 6.36-6.39 (2H, d), 6.54-6.59 (2H, t), 6.98–7.12 (6H, m), 7.15–7.18 (7H, m), 10.18 (1H, NH).

<sup>13</sup>CNMR (DMSO, 75 MHz): δ= 36.24, 47.86, 52.98, 64.83, 103.65, 114.29, 123.53, 127.51, 128.36, 128.53, 129.88, 132.24, 133.28, 136.73, 138.89, 139.44, 149.72, 167.92 ppm.

Anal. Calcd. For C<sub>31</sub>H<sub>26</sub>Cl<sub>2</sub>N<sub>2</sub>O<sub>2</sub>: C, 70.32; H, 4.95; N, 5.29; O, 6.04 Found: C, 70.35; H, 4.90; N, 5.33; O, 6.10.

**Methyl 1-(4-bromophenyl)-4-((4-bromophenyl) amino)-2,6-bis(4-methoxyphenyl)-1,2,5,6-tetrahydro pyridine-3-carboxylate (4l)**

White solid; m.p. = 170–174 °C.

<sup>1</sup>H NMR (300 MHz, CDCl<sub>3</sub>): δ= 2.69-2.89 (2H, dd-dd, CH<sub>2</sub>), 3.81 (3H, s), 3.81-3.82 (6H, d), 3.95 (3H, s), 5.07 (1H, d), 6.20-6.23 (2H, d), 6.31 (1H, s), 6.40-6.43 (2H, d), 6.83-6.86 (4H, dd), 7.05-7.08 (2H, d), 7.14–7.20 (4H, m), 7.24–7.29 (2H, d), 10.24 (1H, NH) ppm.

<sup>13</sup>CNMR (DMSO, 75 MHz): δ= 36.24, 47.86, 54.34, 55.49, 61.47, 102.46, 114.22, 116.24, 116.98, 125.48, 126.23, 127.02, 129.88, 131.23, 132.24, 132.92, 137.80, 149.05, 159.20, 168.46 ppm.

Anal. Calcd. For C<sub>33</sub>H<sub>30</sub>Br<sub>2</sub>N<sub>2</sub>O<sub>4</sub>: C, 58.42; H, 4.46; N, 4.13; O, 9.43 Found: C, 58.41; H, 4.49; N, 4.10; O, 9.41.

5-(chloromethyl)-2-hydroxybenz aldehyde (I)

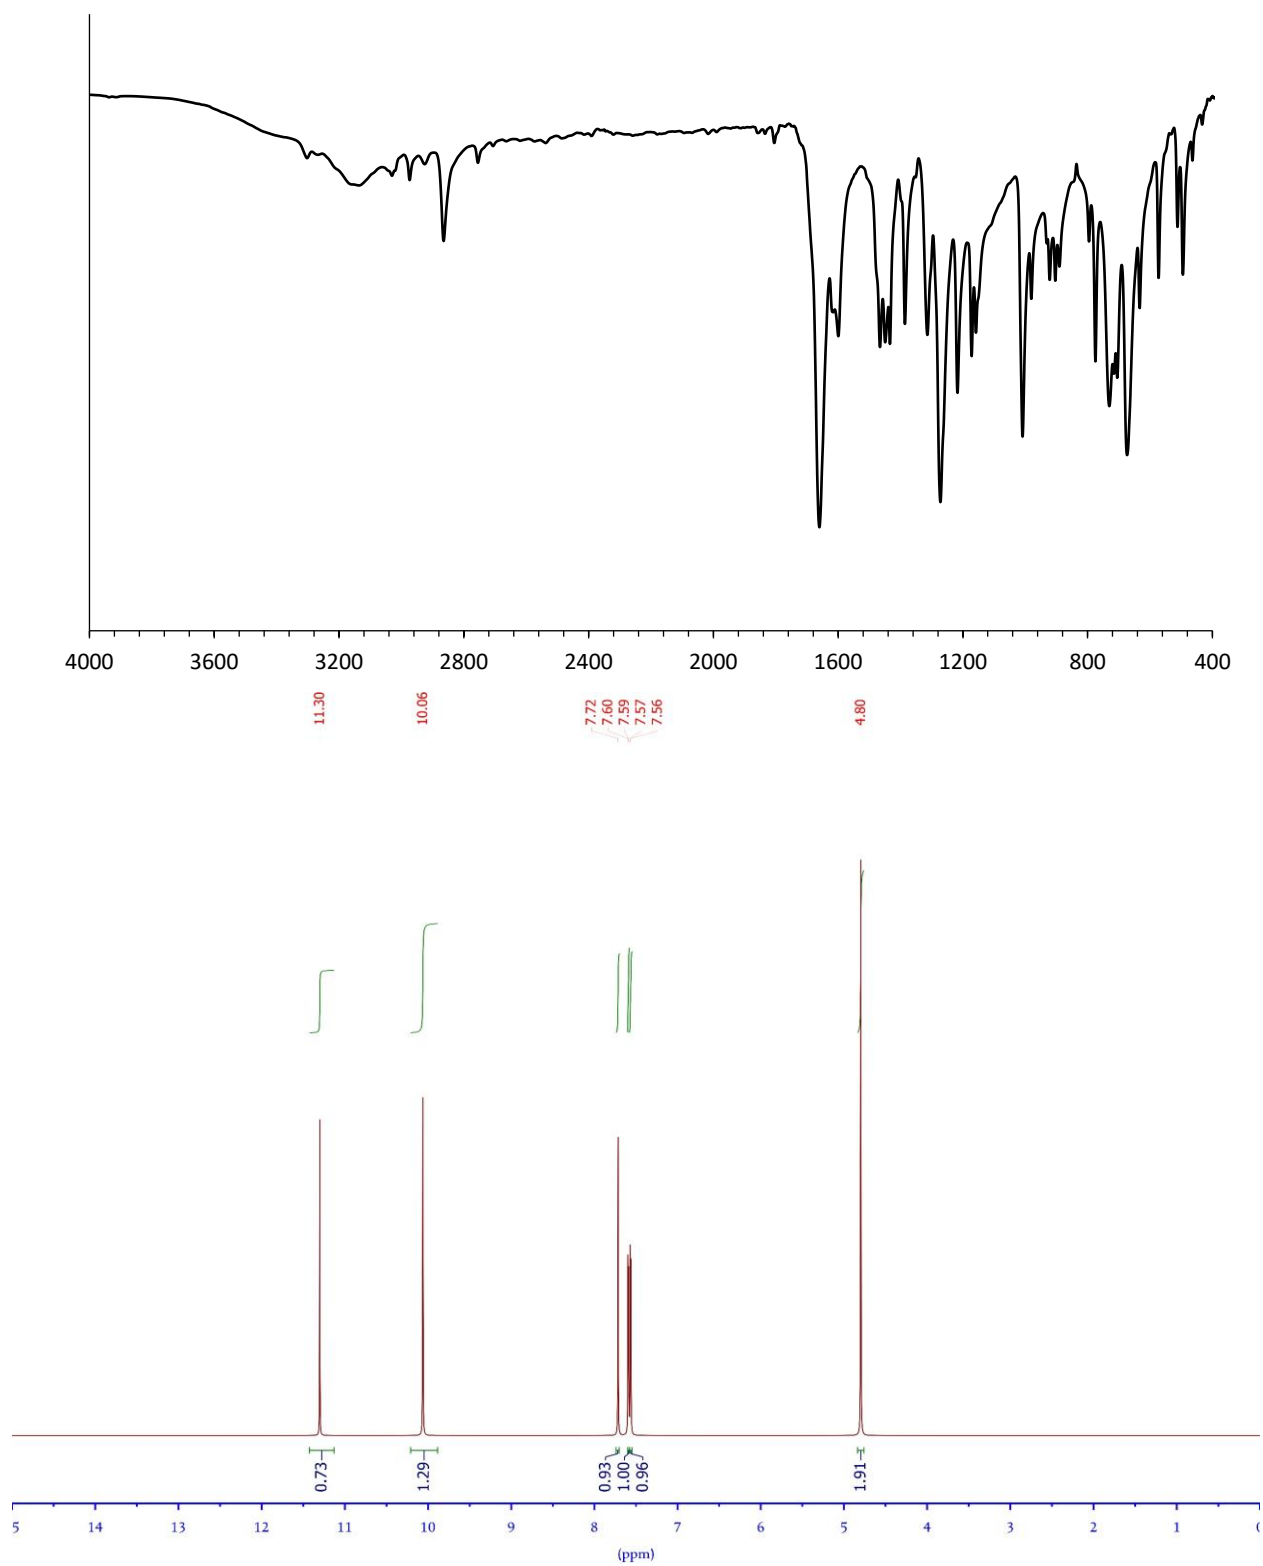

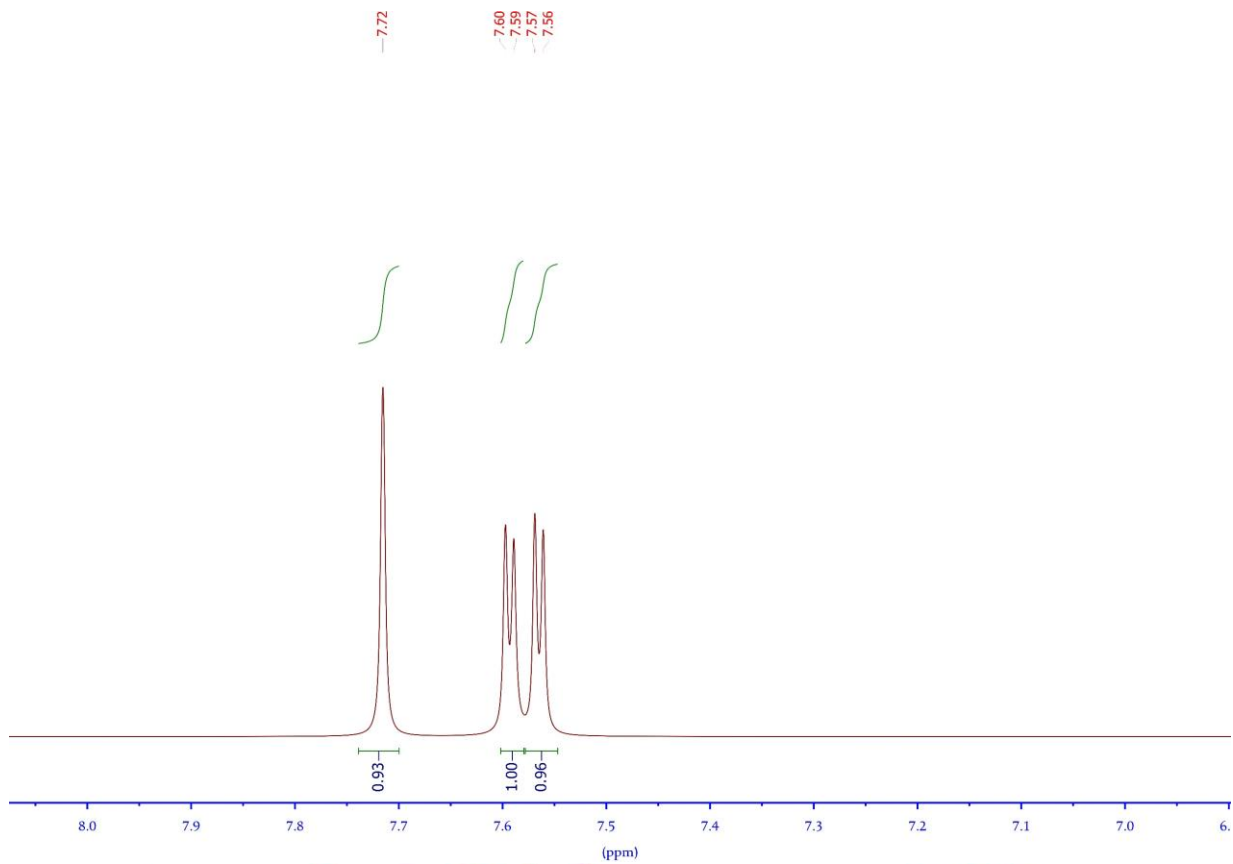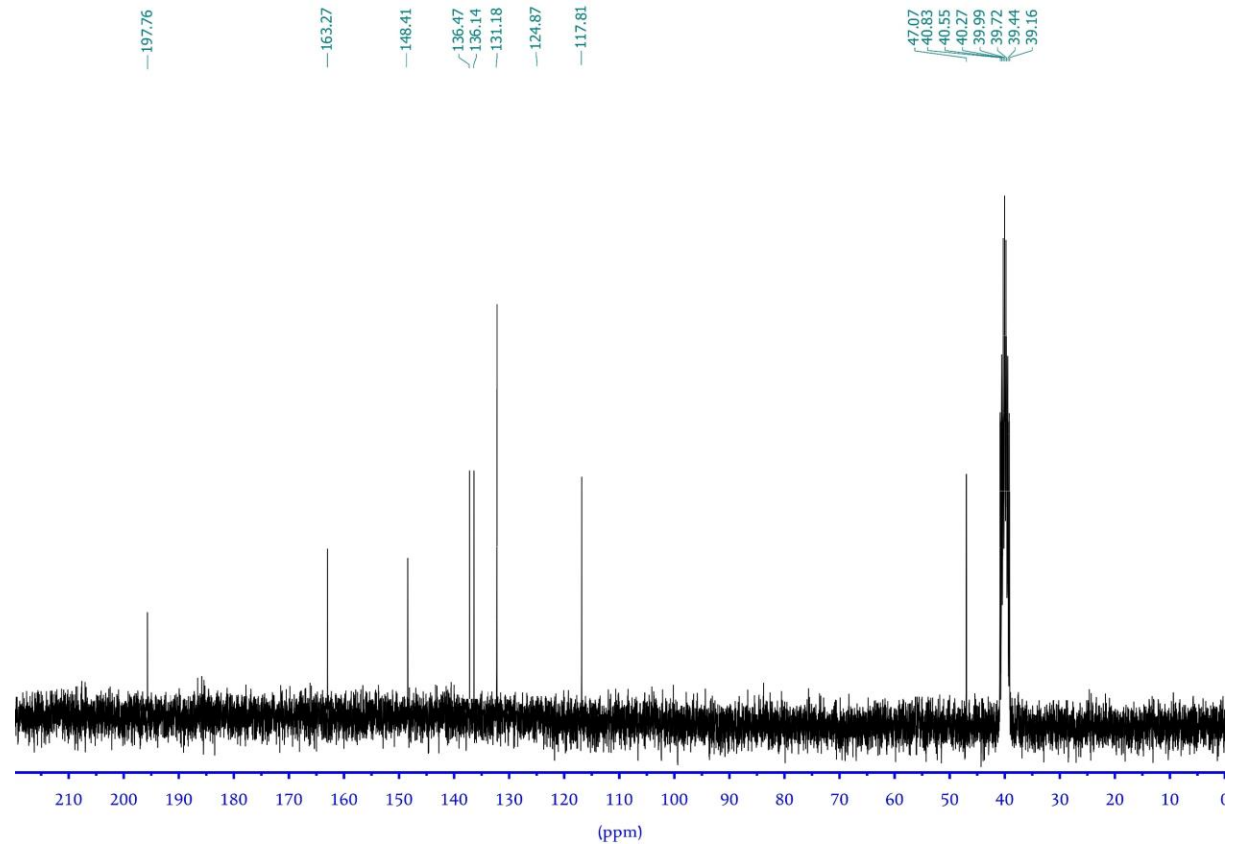

Ethyl 1,2,6-triphenyl-4-(phenylamino)-1,2,5,6-tetrahydropyridine-3-carboxylate (4a)

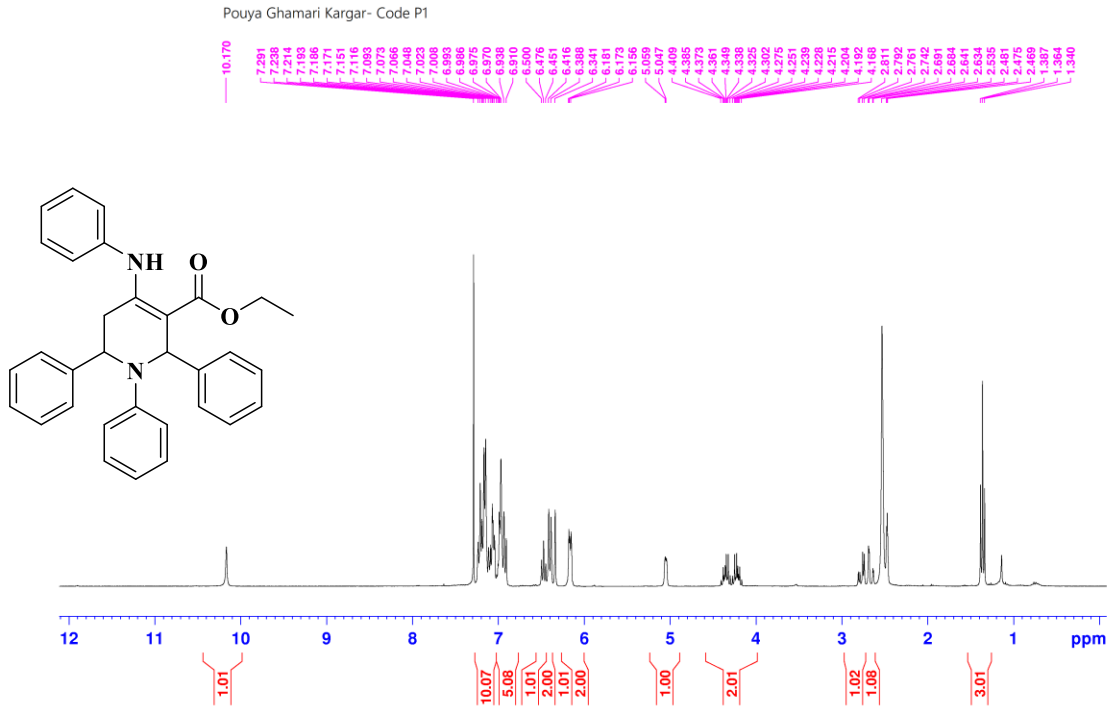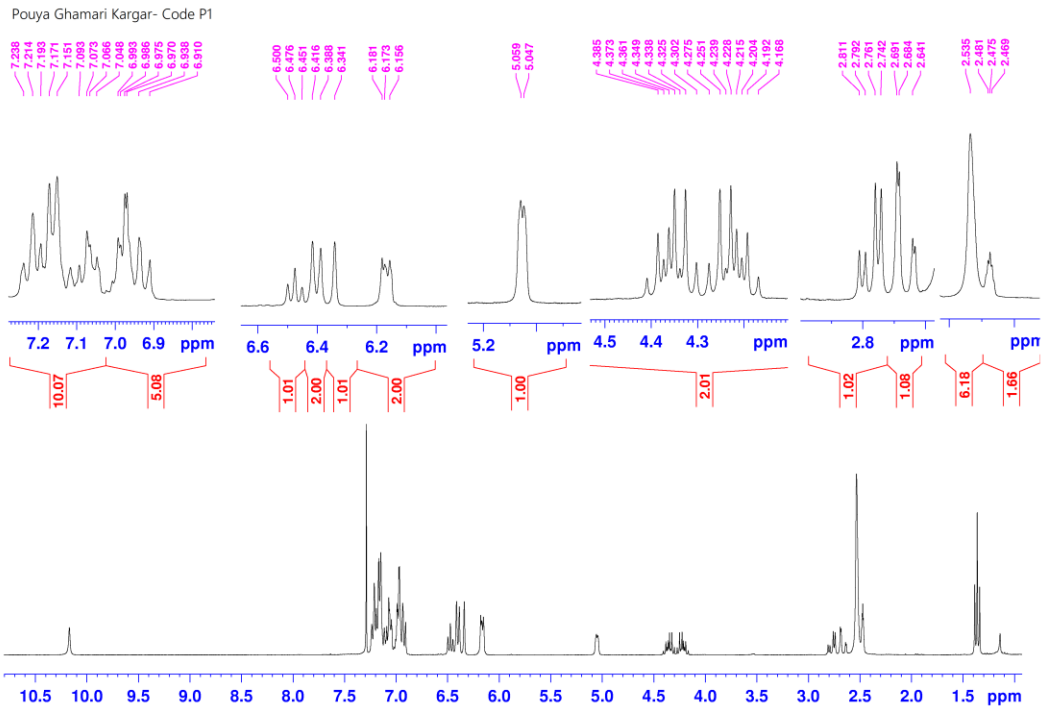

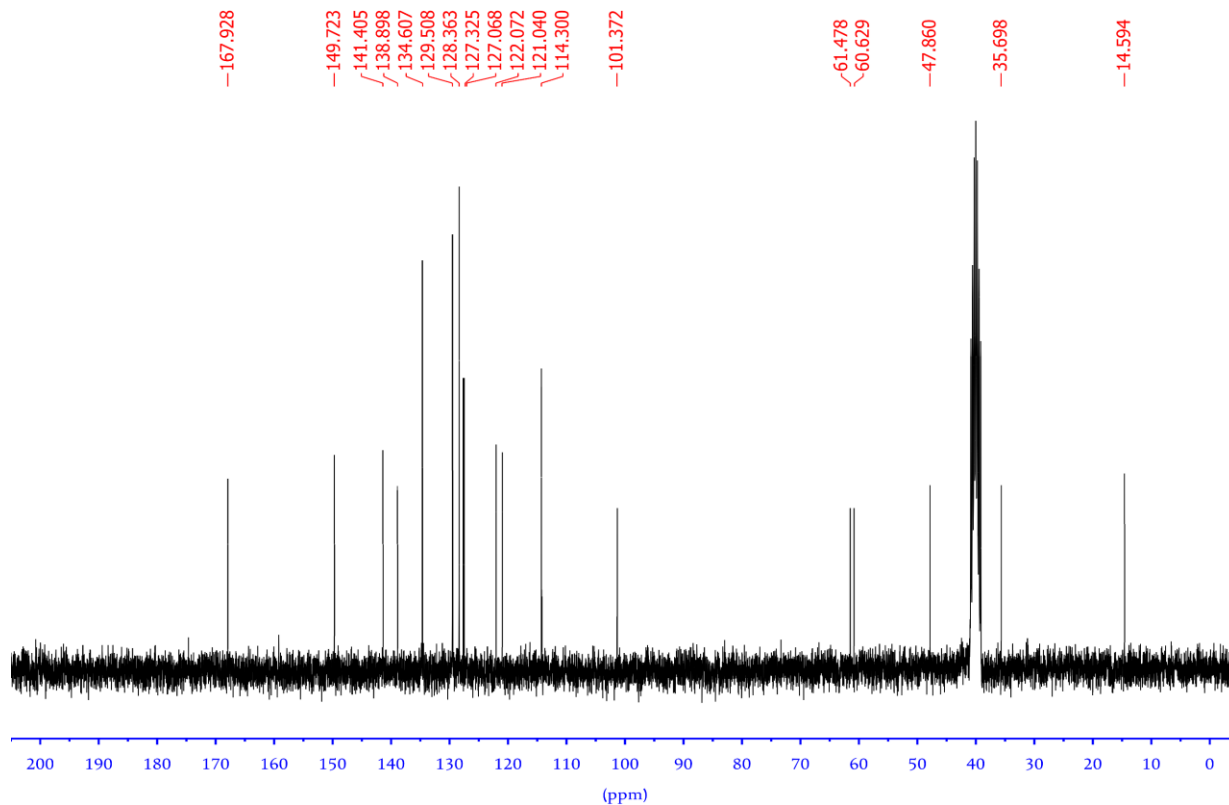

Methyl 1,2,6-triphenyl-4-(phenylamino)-1,2,5,6-tetrahydropyridine-3-carboxylate (4b)

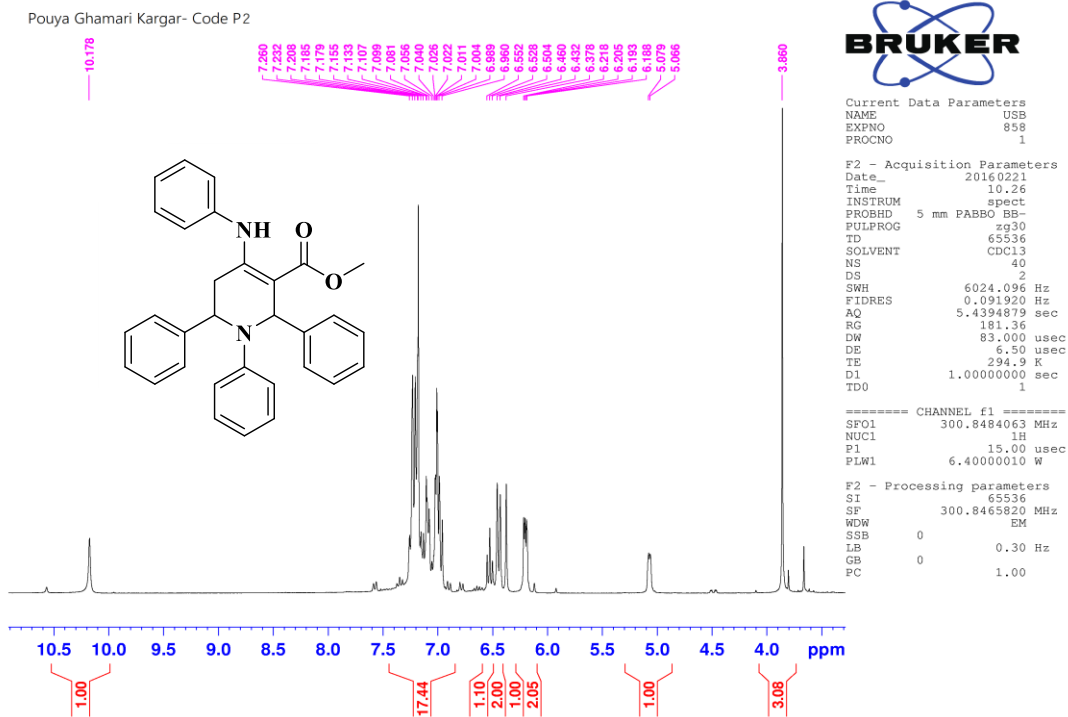

Pouya Ghamari Kargar- Code P2

7.260  
7.232  
7.205  
7.185  
7.179  
7.155  
7.133  
7.107  
7.100  
7.081  
7.056  
7.040  
7.028  
7.012  
7.011  
7.004  
6.989  
6.990

6.552  
6.528  
6.504  
6.480  
6.452  
6.378  
6.218  
6.205  
6.193  
6.188

5.079  
5.066

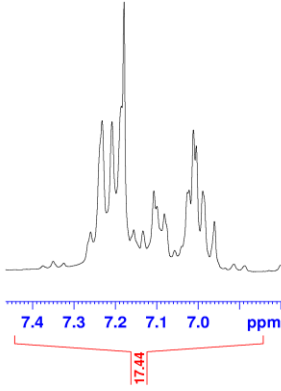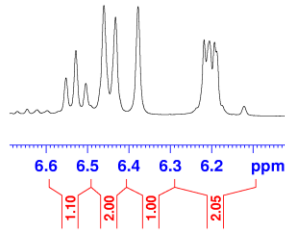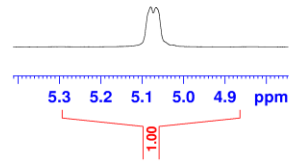

-167.972

-149.603

-141.485

-138.888

-134.616

-129.498

-128.372

-127.305

-127.108

-122.037

-121.043

-114.303

-101.322

-61.462

-51.602

-47.861

-36.699

-14.594

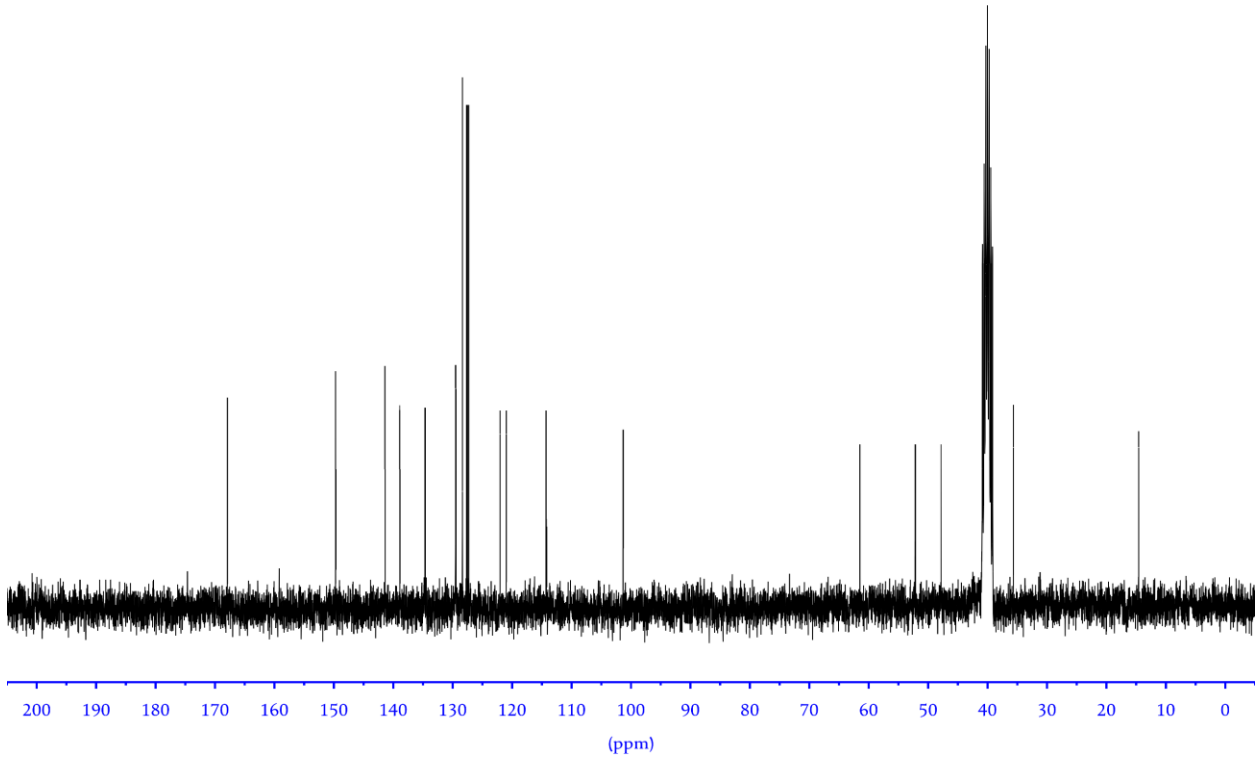

methyl 2,6-bis(4-bromophenyl)-1-(4-chlorophenyl)-4-((4-chlorophenyl) amino)-1,2,5,6-tetrahydropyridine-3-carboxylate (4f)

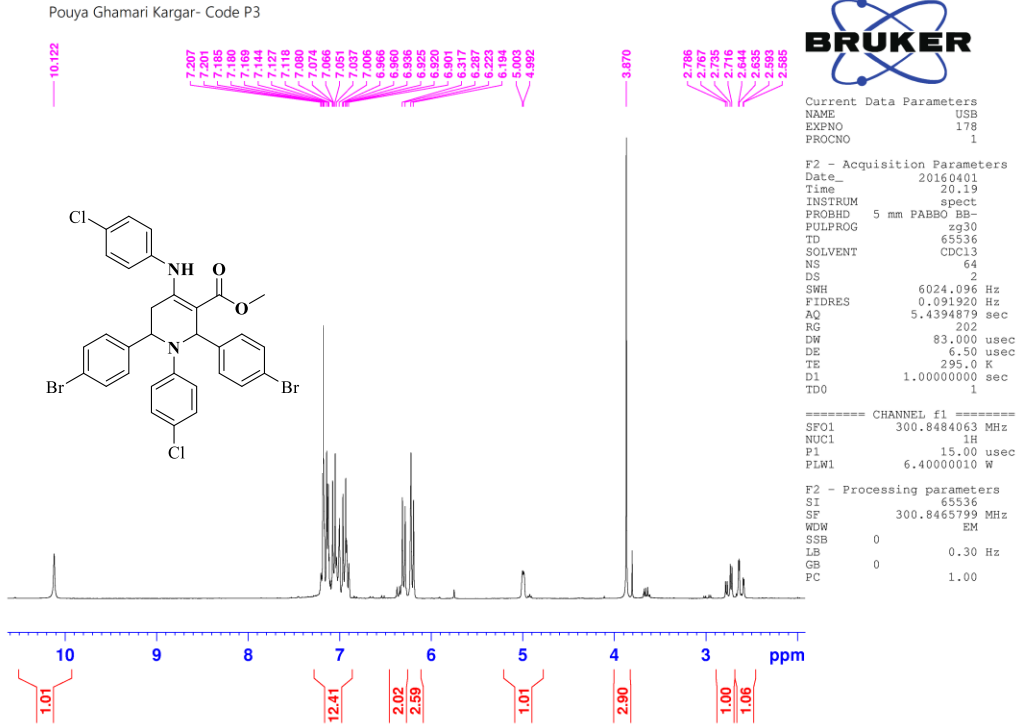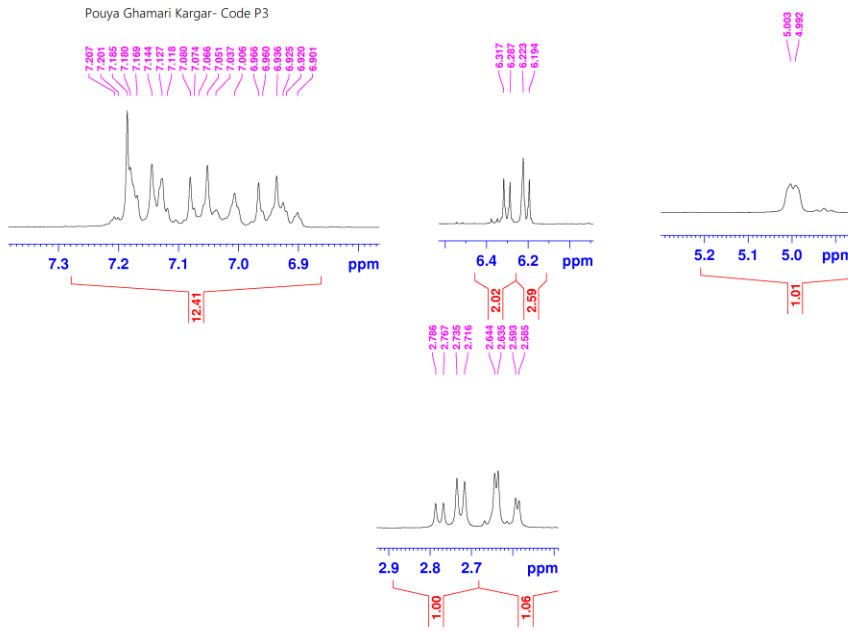



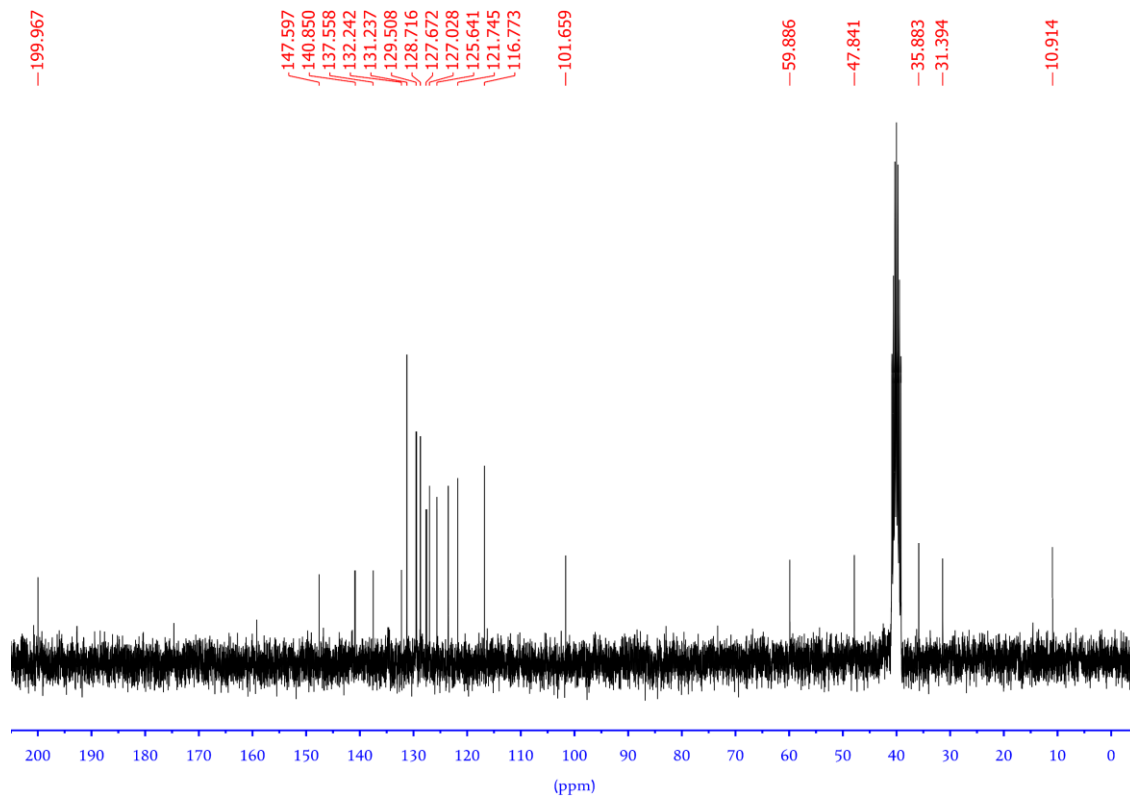

methyl 2,6-bis(4-chlorophenyl)-1-phenyl-4-(phenylamino)-1,2,5,6-tetrahydropyridine-3-carboxylate (4k)

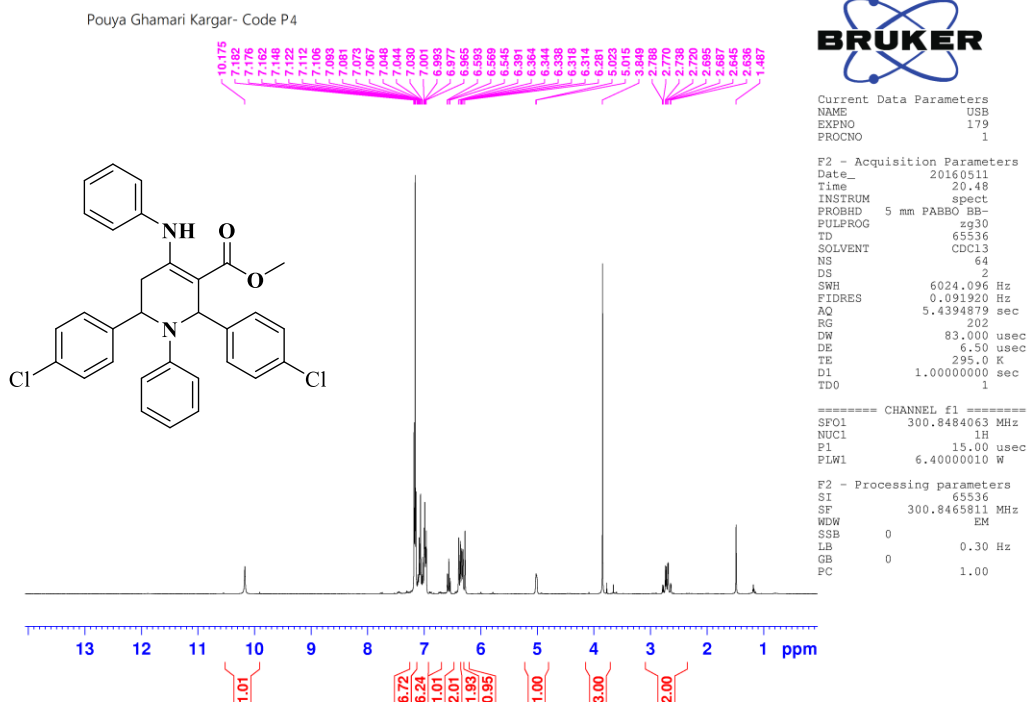

Pouya Ghamari Kargar- Code P4

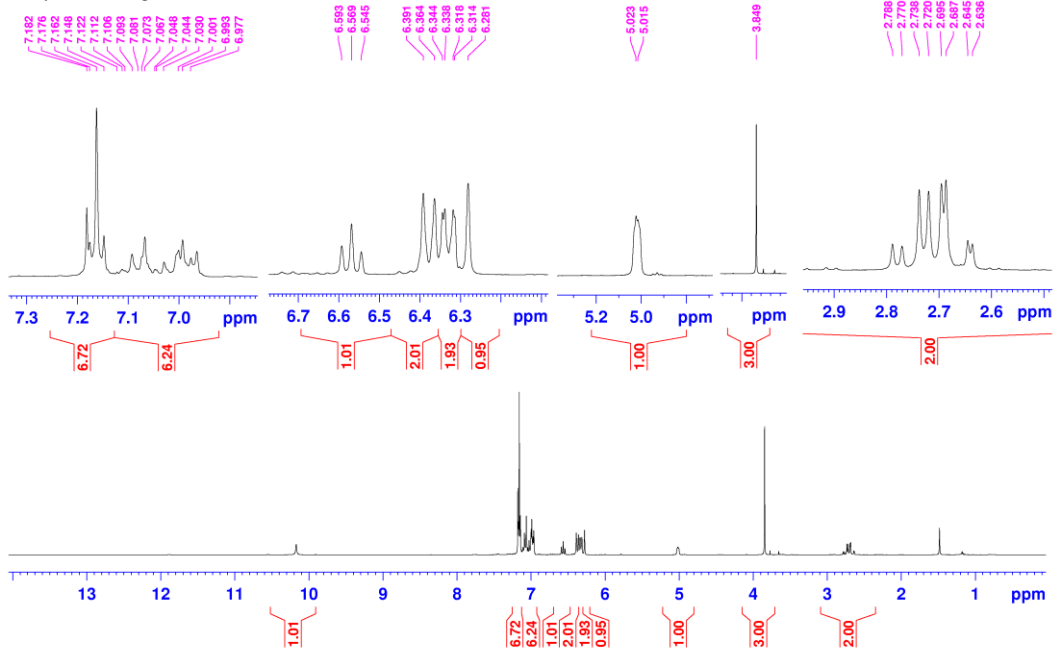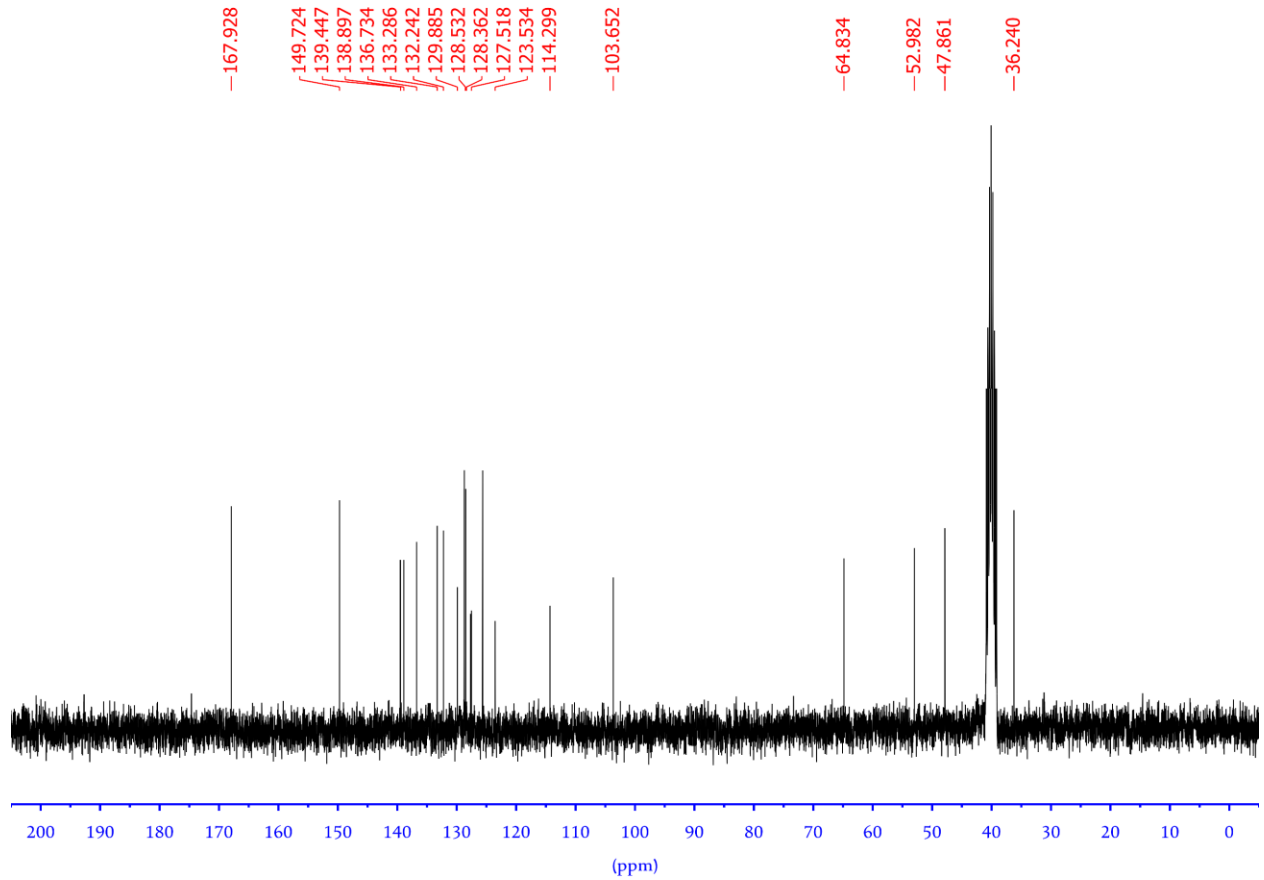

methyl 1-(4-bromophenyl)-4-((4-bromophenyl) amino)-2,6-bis(4-methoxyphenyl)-1,2,5,6-tetrahydropyridine-3-carboxylate (4l)

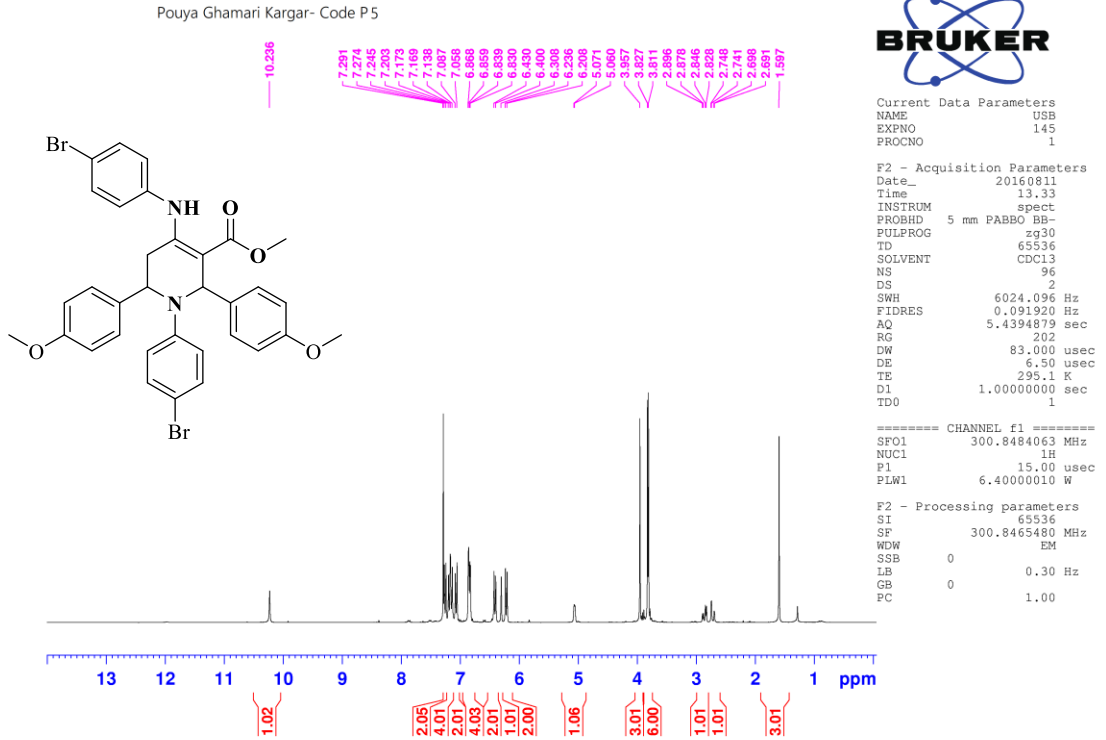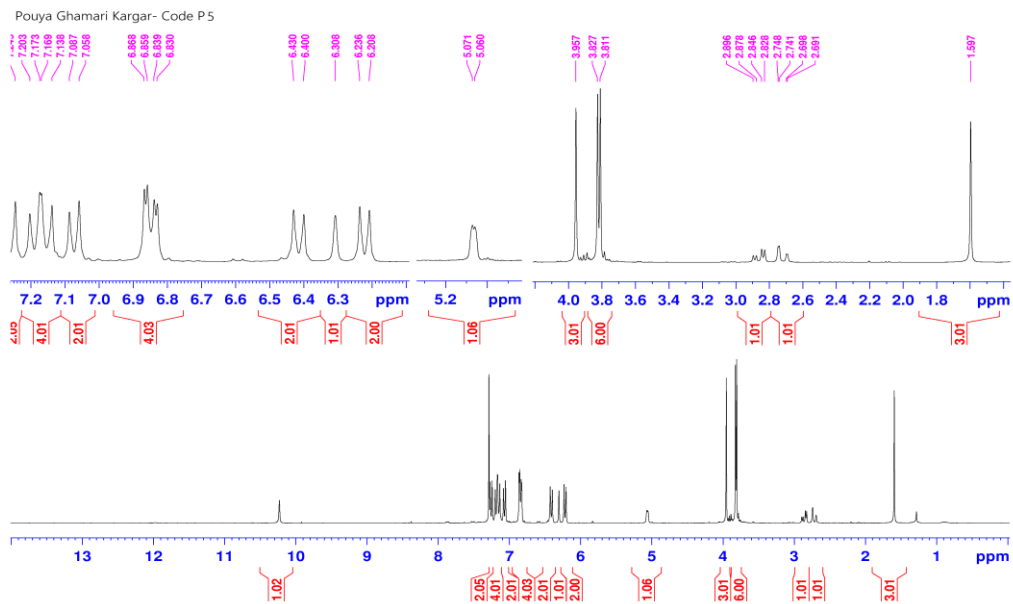

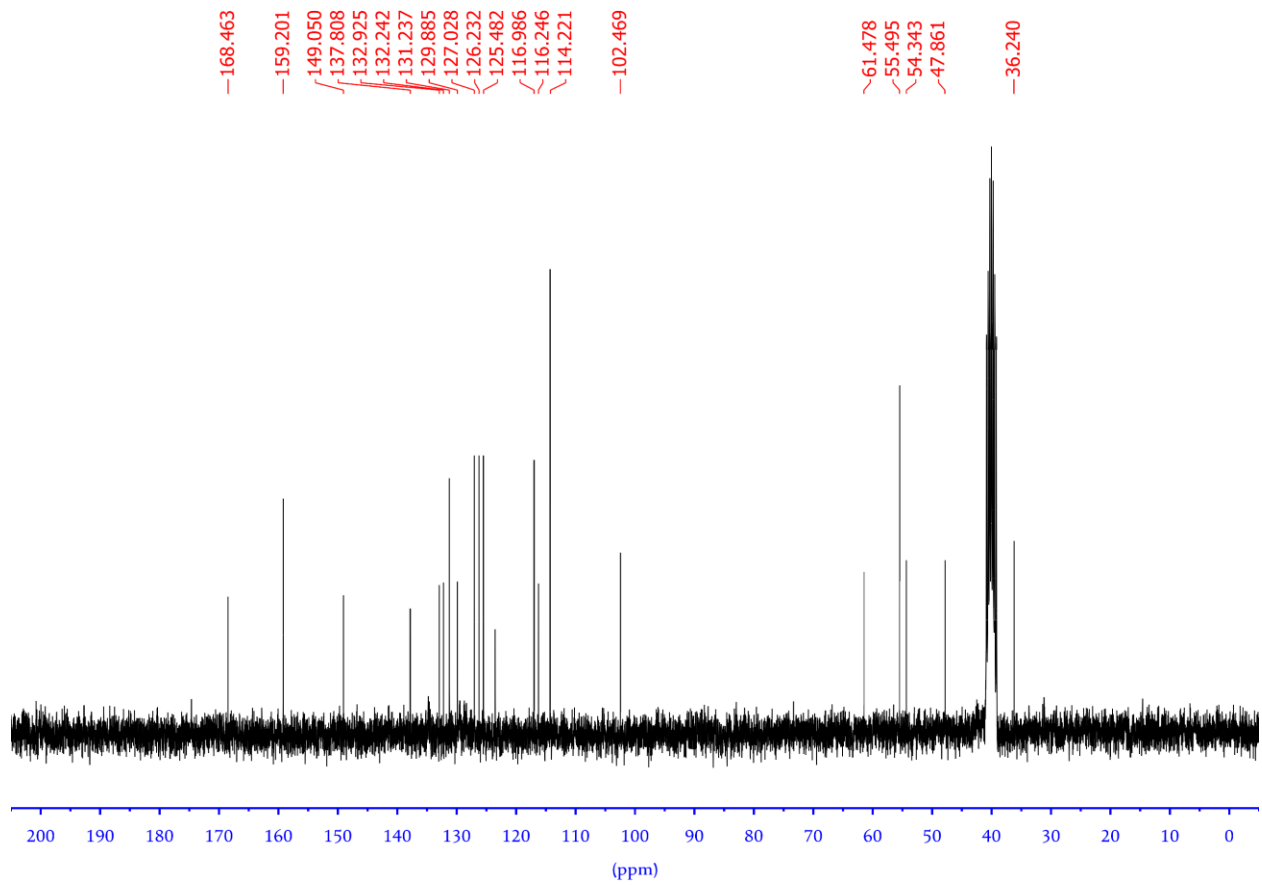

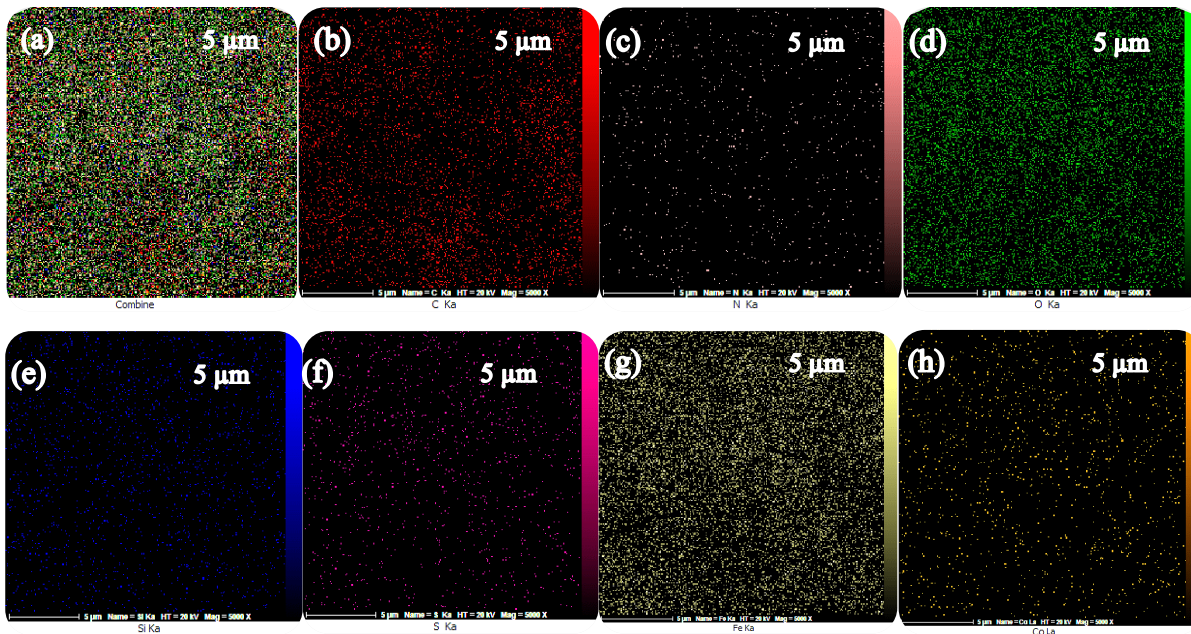

S1: EDS mapping images of a) Combining elements, b) C, e) N, d) O, e) Si, f) S, g) Fe, and h) Co

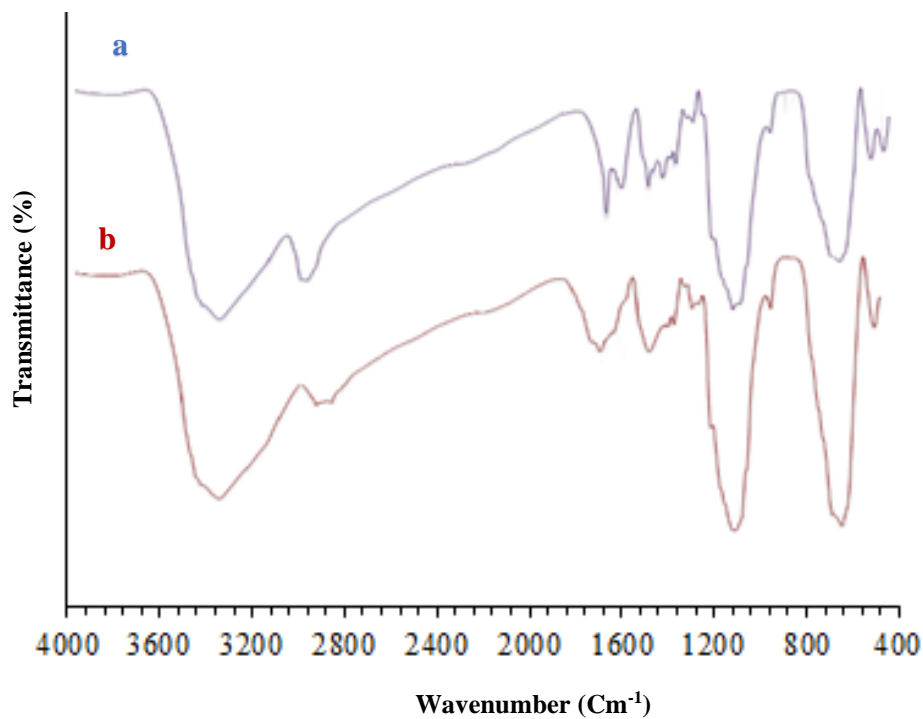

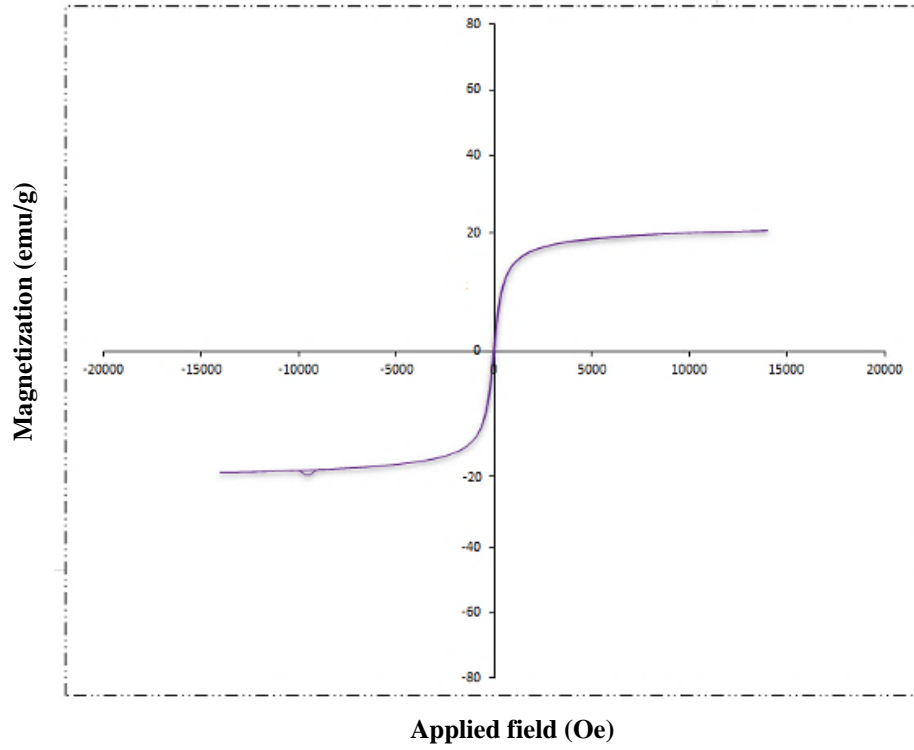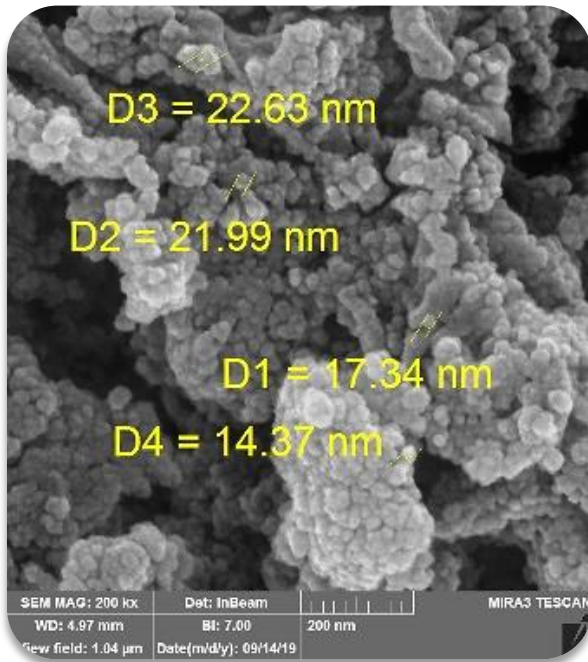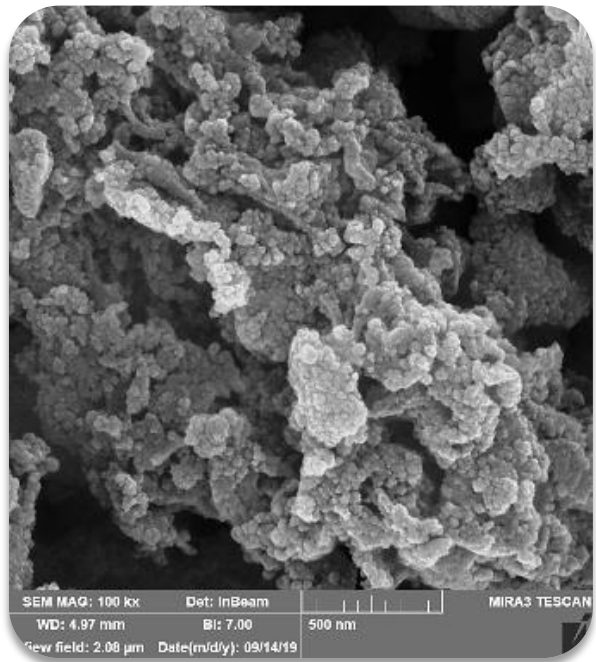

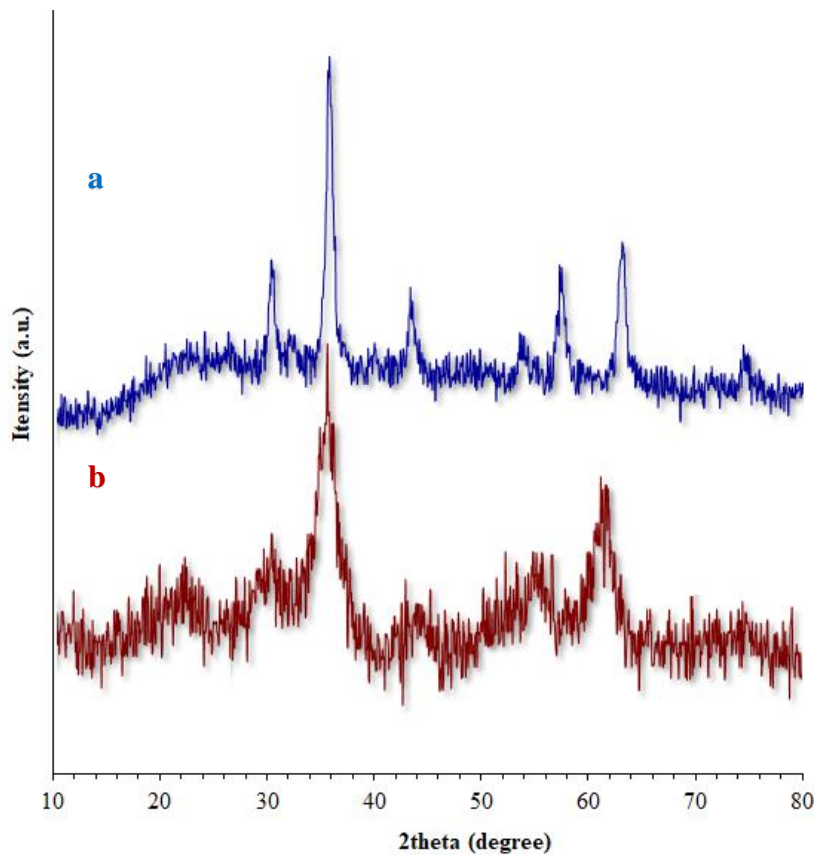

S2: FESEM image and VSM and XRD ((a) after piperidine reaction; and (b) after alcohol oxidation) and FT-IR spectra of MNPs@CNF@ATSM-Co (II): (a) after piperidine reaction; and (b) after alcohol oxidation.
